# Supplementary material for: Catching the chloride: searching for non-Hofmeister selectivity behavior in systematically varied polyamide macrocyclic receptors
Source: Royal Society of Chemistry journal article supplement (doi:10.1039/c7ob01385j), 2017-01-01
Supplement: c7ob01385j1.pdf [file c7ob01385j1.pdf]

**Catching chloride: searching for non-Hofmeister selectivity behavior  
in systematically varied polyamide macrocyclic receptors**

Kajetan Dabrowa, Filip Ulatowski, Dawid Lichosyt, and Janusz Jurczak\*

Institute of Organic Chemistry, Polish Academy of Sciences, Kasprzaka 44/52, 01-224 Warsaw, Poland.

Contact e-mail: jurczak\_group@icho.edu.pl

**Contents**

|                                                                            |          |
|----------------------------------------------------------------------------|----------|
| <b>1. BINDING DATA ANALYSIS</b>                                            | <b>2</b> |
| <b>2. CRYSTAL DATA</b>                                                     | <b>3</b> |
| 2.1 Diffractometer and data collection .....                               | 3        |
| 2.2 Structure refinement .....                                             | 3        |
| 2.3 Crystallographic data .....                                            | 3        |
| <b>3. VISUALIZATION AND CARTESIAN COORDINATES OF CALCULATED STRUCTURES</b> | <b>5</b> |
| <b>4. REFERENCES</b>                                                       | <b>6</b> |

# 1. Binding data analysis

**Table S1.** Binding data for the studied receptors gathered from the literature [a]

| Entry | Host               | Ring-size | Linker | Titration method <sup>[b]</sup> | Solvent mixture                 |                    |           | $K_{a, \text{anion}} \text{ (M}^{-1}\text{)}$ |                                             |                                |                                | $K_{\text{rel}} = \log (K_{a, \text{Cl}^-} / K_{a, \text{anion}})$ |                                |                                | Ref.   |
|-------|--------------------|-----------|--------|---------------------------------|---------------------------------|--------------------|-----------|-----------------------------------------------|---------------------------------------------|--------------------------------|--------------------------------|--------------------------------------------------------------------|--------------------------------|--------------------------------|--------|
|       |                    |           |        |                                 | #1                              | #2                 | %#2 (v/v) | Cl <sup>-</sup>                               | H <sub>2</sub> PO <sub>4</sub> <sup>-</sup> | MeCO <sub>2</sub> <sup>-</sup> | PhCO <sub>2</sub> <sup>-</sup> | H <sub>2</sub> PO <sub>4</sub> <sup>-</sup>                        | MeCO <sub>2</sub> <sup>-</sup> | PhCO <sub>2</sub> <sup>-</sup> |        |
| 1     | Ac1                | -         | -      | A                               | DMSO- <i>d</i> <sub>6</sub>     | -                  | 0         | 12                                            | -                                           | 45                             | -                              | n/a                                                                | -0.57                          | n/a                            | 1      |
| 2     | Ac2                | -         | -      | A                               | DMSO- <i>d</i> <sub>6</sub>     | -                  | 0         | 45                                            | 285                                         | 162                            | -                              | -0.80                                                              | -0.55                          | n/a                            | 2      |
| 3     | Ac3                | -         | -      | A                               | DMSO- <i>d</i> <sub>6</sub>     | -                  | 0         | 14                                            | 60                                          | 130                            | -                              | -0.63                                                              | -0.97                          | n/a                            | 3      |
| 4     | Ac4                | -         | -      | A                               | DMSO- <i>d</i> <sub>6</sub>     | H <sub>2</sub> O   | 5         | 5                                             | 150                                         | -                              | 13                             | -1.48                                                              | n/a                            | -0.41                          | 4      |
| 5     | Ac4                | -         | -      | A                               | DMSO- <i>d</i> <sub>6</sub>     | MeOH               | 10        | 5                                             | 93                                          | -                              | 10                             | -1.27                                                              | n/a                            | -0.30                          | 4      |
| 6     | Ac5                | -         | -      | B                               | MeCN                            | -                  | 0         | 540000                                        | 31000                                       | 630000                         | -                              | 1.24                                                               | -0.07                          | n/a                            | 5      |
| 7     | Ac5                | -         | -      | B                               | DMSO                            | -                  | 0         | 710                                           | 4200                                        | 2200                           | -                              | -0.77                                                              | -0.49                          | n/a                            | 5      |
| 8     | Ac6 <sup>[c]</sup> | -         | -      | A                               | MeCN                            | -                  | 0         | 1540                                          | 120                                         | 2410                           | -                              | 1.11                                                               | -0.19                          | n/a                            | 6      |
| 9     | Ac7                | -         | -      | A                               | Acetone                         | -                  | 0         | 12000                                         | -                                           | 4300                           | -                              | n/a                                                                | 0.45                           | n/a                            | 7      |
| 10    | Ac8                | -         | -      | B                               | MeCN                            | -                  | 0         | 19000000                                      | 660000                                      | -                              | -                              | 1.46                                                               | n/a                            | n/a                            | 8      |
| 11    | M1                 | 18        | 2      | A                               | DMSO- <i>d</i> <sub>6</sub>     | -                  | 0         | 65                                            | 1680                                        | 2640                           | -                              | -1.41                                                              | -1.61                          | n/a                            | 1      |
| 12    | M2                 | 18        | 2      | A                               | DMSO- <i>d</i> <sub>6</sub>     | -                  | 0         | 390.5                                         | 2226                                        | 6331                           | -                              | -0.76                                                              | -1.21                          | n/a                            | 9      |
| 13    | M3                 | 20        | 2      | A                               | DMSO- <i>d</i> <sub>6</sub>     | -                  | 0         | 204                                           | 617                                         | -                              | 260                            | -0.48                                                              | n/a                            | -0.11                          | 10     |
| 14    | M4                 | 20        | 2      | A                               | DMSO- <i>d</i> <sub>6</sub>     | -                  | 0         | 29                                            | 327                                         | -                              | -                              | -1.05                                                              | n/a                            | n/a                            | 10     |
| 15    | M5                 | 18        | 2      | A                               | DMSO- <i>d</i> <sub>6</sub>     | -                  | 0         | 1100                                          | 3900                                        | 14000                          | -                              | -0.55                                                              | -1.10                          | n/a                            | 11     |
| 16    | M6                 | 20        | 3      | A                               | DMSO- <i>d</i> <sub>6</sub>     | -                  | 0         | 1930                                          | 7410                                        | 3240                           | 2283                           | -0.58                                                              | -0.22                          | -0.07                          | 12     |
| 17    | M6                 | 20        | 3      | A                               | DMSO- <i>d</i> <sub>6</sub>     | H <sub>2</sub> O   | 5         | 373                                           | 575                                         | -                              | 292                            | -0.19                                                              | n/a                            | 0.11                           | 12     |
| 18    | M7                 | 20        | 3      | A                               | DMSO- <i>d</i> <sub>6</sub>     | -                  | 0         | 378                                           | - <sup>[d]</sup>                            | 3130                           | -                              | n/a                                                                | -0.92                          | n/a                            | 13     |
| 19    | M7                 | 20        | 3      | A                               | DMSO- <i>d</i> <sub>6</sub>     | H <sub>2</sub> O   | 5         | 98                                            | 1320                                        | -                              | 169                            | -1.13                                                              | n/a                            | -0.24                          | 13     |
| 20    | M8                 | 20        | 3      | A                               | DMSO- <i>d</i> <sub>6</sub>     | MeOH               | 10        | 93                                            | 25000                                       | -                              | 13000                          | -2.43                                                              | n/a                            | -2.15                          | 4      |
| 21    | M9                 | 20        | 3      | A                               | DMSO- <i>d</i> <sub>6</sub>     | -                  | 0         | 2148                                          | 8000                                        | -                              | 3612                           | -0.57                                                              | n/a                            | -0.23                          | 14     |
| 22    | M9                 | 20        | 3      | A                               | DMSO- <i>d</i> <sub>6</sub>     | H <sub>2</sub> O   | 5         | 555                                           | 2680                                        | -                              | 666                            | -0.68                                                              | n/a                            | -0.08                          | 14     |
| 23    | M10                | 20        | 3      | A                               | DMSO- <i>d</i> <sub>6</sub>     | H <sub>2</sub> O   | 5         | 280                                           | -                                           | -                              | 3700                           | n/a                                                                | n/a                            | -1.12                          | 4      |
| 24    | M10                | 20        | 3      | A                               | DMSO- <i>d</i> <sub>6</sub>     | MeOH               | 10        | 270                                           | 4800                                        | -                              | 1700                           | -1.25                                                              | n/a                            | -0.80                          | 4      |
| 25    | M11                | 22        | 4      | A                               | DMSO- <i>d</i> <sub>6</sub>     | -                  | 0         | 296                                           | 573                                         | 552                            | 302                            | -0.29                                                              | -0.27                          | -0.01                          | 3      |
| 26    | M12                | 24        | 5      | A                               | DMSO- <i>d</i> <sub>6</sub>     | -                  | 0         | 18                                            | 450                                         | 310                            | 301                            | -1.40                                                              | -1.24                          | -1.22                          | 12     |
| 27    | M13                | 24        | 5      | A                               | DMSO- <i>d</i> <sub>6</sub>     | -                  | 0         | 48                                            | - <sup>[d]</sup>                            | 205                            | 82                             | n/a                                                                | -0.63                          | -0.23                          | 3      |
| 28    | M14                | 24        | 2      | A                               | DMSO- <i>d</i> <sub>6</sub>     | -                  | 0         | 25                                            | 830                                         | -                              | -                              | -1.52                                                              | n/a                            | n/a                            | 15     |
| 29    | M15                | 24        | 2      | A                               | DMSO- <i>d</i> <sub>6</sub>     | -                  | 0         | 490                                           | 11000                                       | -                              | -                              | -1.35                                                              | n/a                            | n/a                            | 15-16  |
| 30    | M16                | 30        | -      | A                               | DMSO- <i>d</i> <sub>6</sub>     | -                  | 0         | 28                                            | 1000                                        | 88                             | 35                             | -1.55                                                              | -0.50                          | -0.10                          | 17     |
| 31    | M17                | 24        | -      | B                               | DMSO                            | -                  | 0         | 4000                                          | 24000                                       | 3300                           | 26300                          | -0.78                                                              | 0.08                           | -0.82                          | 18     |
| 32    | M18                | 24        | -      | B                               | DMSO                            | -                  | 0         | 19000                                         | 21000                                       | 43700                          | 145000                         | -0.04                                                              | -0.36                          | -0.88                          | 18     |
| 33    | M19                | 22        | -      | B                               | MeCN                            | -                  | 0         | 2000                                          | 342000                                      | 38000                          | 64000                          | -2.23                                                              | -1.28                          | -1.51                          | 19     |
| 34    | M20                | 22        | -      | B                               | MeCN                            | -                  | 0         | 116000                                        | 15500                                       | 67000                          | 47000                          | 0.87                                                               | 0.24                           | 0.39                           | 20     |
| 35    | M21 <sup>[e]</sup> | 16        | -      | A                               | DMSO- <i>d</i> <sub>6</sub>     | -                  | 0         | 100000                                        | 1400                                        | 140                            | -                              | 1.85                                                               | 2.85                           | n/a                            | 21     |
| 36    | M22 <sup>[e]</sup> | 16        | -      | A                               | DMSO- <i>d</i> <sub>6</sub>     | -                  | 0         | 270                                           | 15000                                       | 77000                          | -                              | -1.74                                                              | -2.46                          | n/a                            | 21     |
| 37    | M23                | 22        | -      | B                               | MeCN                            | -                  | 0         | 11900000                                      | 4390000                                     | 15900000                       | -                              | 0.43                                                               | -0.13                          | n/a                            | 22     |
| 38    | M23                | 22        | -      | B                               | MeCN                            | H <sub>2</sub> O   | 5         | 995000                                        | -                                           | 5430                           | -                              | n/a                                                                | 2.26                           | n/a                            | 22     |
| 39    | M24                | 16        | -      | A                               | CD <sub>2</sub> Cl <sub>2</sub> | -                  | 0         | 350                                           | 97                                          | 668                            | 196                            | 0.56                                                               | -0.28                          | 0.25                           | 23     |
| 40    | M24 <sup>[e]</sup> | 16        | -      | C                               | MeCN                            | -                  | 0         | 140000                                        | -                                           | 290000                         | 115000                         | -                                                                  | -0.31                          | 0.09                           | 24     |
| 41    | M24 <sup>[e]</sup> | 16        | -      | C                               | DMSO                            | -                  | 0         | 1300                                          | 5100                                        | 6100                           | -                              | -0.59                                                              | -0.67                          | -                              | 25     |
| 42    | M25 <sup>[e]</sup> | 16        | -      | C                               | MeCN                            | -                  | 0         | 530000                                        | -                                           | 1900000                        | 1200000                        | -                                                                  | -0.55                          | -0.35                          | 25     |
| 43    | M25 <sup>[e]</sup> | 16        | -      | C                               | DMSO                            | -                  | 0         | 1500                                          | 17000                                       | 48000                          | -                              | -1.05                                                              | -1.51                          | -                              | 25     |
| 44    | Uc1                | 22        | 2      | A                               | DMSO- <i>d</i> <sub>6</sub>     | H <sub>2</sub> O   | 0.5       | 96                                            | - <sup>[d]</sup>                            | - <sup>[d]</sup>               | 95                             | n/a                                                                | n/a                            | 0.00                           | 26     |
| 45    | Uc2                | 24        | 3      | A                               | DMSO- <i>d</i> <sub>6</sub>     | H <sub>2</sub> O   | 0.5       | 484                                           | - <sup>[d]</sup>                            | 490                            | 269                            | n/a                                                                | -0.01                          | 0.26                           | 26     |
| 46    | Uc3                | 24        | 3      | A                               | DMSO- <i>d</i> <sub>6</sub>     | H <sub>2</sub> O   | 0.5       | 778                                           | 1268                                        | 642                            | 162                            | -0.21                                                              | 0.08                           | 0.68                           | 26     |
| 47    | Uc4                | 26        | 4      | A                               | DMSO- <i>d</i> <sub>6</sub>     | H <sub>2</sub> O   | 0.5       | 11                                            | 7286                                        | 191                            | 128                            | -2.82                                                              | -1.24                          | -1.07                          | 26     |
| 48    | Uc5                | 26        | 4      | A                               | DMSO- <i>d</i> <sub>6</sub>     | H <sub>2</sub> O   | 0.5       | 9                                             | 1738                                        | 262                            | 251                            | -2.29                                                              | -1.46                          | -1.45                          | 27     |
| 49    | Cr1                | 24        | -      | A                               | CD <sub>2</sub> Cl <sub>2</sub> | CD <sub>3</sub> CN | 75        | 40                                            | 25                                          | 770                            | -                              | 0.20                                                               | -1.28                          | n/a                            | 28     |
| 50    | Cr2                | 24        | 2      | A                               | DMSO- <i>d</i> <sub>6</sub>     | -                  | 0         | 820                                           | - <sup>[d]</sup>                            | 46                             | -                              | n/a                                                                | 1.25                           | n/a                            | 29     |
| 51    | Cr3                | 24        | 2      | A                               | DMSO- <i>d</i> <sub>6</sub>     | -                  | 0         | 2950                                          | 2040                                        | 2400                           | -                              | 0.16                                                               | 0.09                           | n/a                            | 29, 30 |
| 52    | Cr4                | 24        | 2      | A                               | DMSO- <i>d</i> <sub>6</sub>     | -                  | 0         | 35                                            | 2512                                        | 13000                          | -                              | -1.86                                                              | -2.57                          | n/a                            | 30     |
| 53    | Cr5                | 28        | 2      | A                               | DMSO- <i>d</i> <sub>6</sub>     | -                  | 0         | 180                                           | 170                                         | 130                            | -                              | 0.02                                                               | 0.14                           | n/a                            | 31, 32 |

**Table S1.** Continuation.

| Entry | Host                | Ring-size | Linker | Titration method <sup>[b]</sup> | Solvent mixture             |                  |           | Cl <sup>-</sup> | $K_{a, \text{anion}}$ (M <sup>-1</sup> )    |                                |                                | $K_{\text{rel}} = \log(K_{a, \text{Cl}^-} / K_{a, \text{anion}})$ |                                |                                | Ref. |
|-------|---------------------|-----------|--------|---------------------------------|-----------------------------|------------------|-----------|-----------------|---------------------------------------------|--------------------------------|--------------------------------|-------------------------------------------------------------------|--------------------------------|--------------------------------|------|
|       |                     |           |        |                                 | #1                          | #2               | %#2 (v/v) |                 | H <sub>2</sub> PO <sub>4</sub> <sup>-</sup> | MeCO <sub>2</sub> <sup>-</sup> | PhCO <sub>2</sub> <sup>-</sup> | H <sub>2</sub> PO <sub>4</sub> <sup>-</sup>                       | MeCO <sub>2</sub> <sup>-</sup> | PhCO <sub>2</sub> <sup>-</sup> |      |
| 55    | Cr6                 | 24.33     | -      | A                               | DMSO- <i>d</i> <sub>6</sub> | -                | 0         | 350             | - <sup>[d]</sup>                            | 380                            | -                              | n/a                                                               | -0.04                          | n/a                            | 31   |
| 56    | Cr7                 | 24.30     | -      | A                               | DMSO- <i>d</i> <sub>6</sub> | -                | 0         | 10              | 740                                         | 100                            | -                              | -1.87                                                             | -1.00                          | n/a                            | 32   |
| 57    | Cr8                 | 36        | 2      | A                               | DMSO- <i>d</i> <sub>6</sub> | -                | 0         | 850             | 760                                         | 1380                           | -                              | 0.05                                                              | -0.21                          | n/a                            | 33   |
| 58    | Cr9 <sup>[e]</sup>  | 16.22     | 3      | C                               | DMSO                        | H <sub>2</sub> O | 20        | 26000           | 10                                          | 10                             | -                              | 3.41                                                              | 3.41                           | n/a                            | 34   |
| 59    | Cr10 <sup>[e]</sup> | 16.22     | 5      | C                               | MeCN                        | -                | 0         | 2600000         | 2800                                        | 1600                           | 6000                           | 2.97                                                              | 3.21                           | 2.64                           | 35   |
| 60    | Cr11 <sup>[e]</sup> | 16.22     | 3      | C                               | MeCN                        | -                | 0         | 3500000         | 7700                                        | -                              | 2700                           | 2.66                                                              | n/a                            | 3.11                           | 35   |
| 61    | Cr12 <sup>[e]</sup> | 16.23     | 4      | C                               | MeCN                        | -                | 0         | 8700000         | 50000                                       | -                              | 55000                          | 2.24                                                              | n/a                            | 2.20                           | 35   |
| 62    | Cr13 <sup>[e]</sup> | 16.24     | 5      | C                               | MeCN                        | -                | 0         | 4000000         | 20000                                       | 280000                         | 53000                          | 2.30                                                              | 1.15                           | 1.88                           | 35   |

[a] All titration experiments were conducted at 298K, if not otherwise stated; [b] A: <sup>1</sup>H NMR, B: UV-Vis, C: ITC; [c] temperature was not reported; [d] complex binding mode; [e] T = 303 K.

## 2. Crystal Data

### 2.1 Diffractometer and data collection

The x-ray measurements of **Uc1**·H<sub>2</sub>O and **Uc1**·TBACl were performed at 100(2) K on a KM4CCD  $\kappa$ -axis diffractometer with graphite-monochromated MoK $_{\alpha}$ . The corresponding crystal was positioned at 62 mm from the CCD camera. 1200 (**Uc1**) or 750 (**Uc1**·TBACl) frames were measured at 1° intervals with a counting time of 11 or 9 sec for **Uc1** and **Uc1**·TBACl, respectively. The data were corrected for Lorentz and polarization effects. Empirical correction for absorption was applied.<sup>36</sup> Data reduction and analysis were carried out with the Oxford Diffraction programs.<sup>36-37</sup>

### 2.2 Structure refinement

The structure was solved by direct methods<sup>38</sup> and refined using WinGX<sup>39</sup> and SHELXL Software Package.<sup>40</sup> The refinement was based on F<sup>2</sup> for all reflections except those with very negative F<sup>2</sup>. Weighted R factors wR and all goodness-of-fit S values are based on F<sup>2</sup>. Conventional R factors are based on F with F set to zero for negative F<sup>2</sup>. The F<sub>o</sub><sup>2</sup>>2σ(F<sub>o</sub><sup>2</sup>) criterion was used only for calculating R factors and is not relevant to the choice of reflections for the refinement. The R factors based on F<sup>2</sup> are about twice as large as those based on F. All hydrogen atoms were located geometrically and their position and temperature factors were not refined except those engaged in hydrogen bonds. Scattering factors were taken from Tables 6.1.1.4 and 4.2.4.2 in Ref. <sup>41</sup>. The H-bonds in crystal structure were determined according to IUPAC recommendation.<sup>42</sup>

The crystal structure of **Uc1** contains disordered *p*-nitrophenyl substituent and partially occupied solvent molecules such as disordered *n*-pentan, water, and methanol molecules. All of the oxygen-containing solvent molecules, except the water molecule located within macrocyclic cavity, were refinement without the hydrogen atoms. It is noteworthy that, the exact dimensions and cell volume should be probably doubled (i.e.: a = 8.214 Å, b = 19.363 Å, c = 23.930 Å, α = 109.07°, β = 97.28°, γ = 93.34°, V = 3547.71 Å<sup>3</sup>) as compared to the data mentioned in the cif file. However, since the reflections proving this assumption were weak, the final structure was refinement as the average from two smaller elemental cells.

The crystal structure of **Uc1**·TBACl contains water molecule which is dislocated between two adjacent macrocycles. This results in incomplete hydrogen bond saturation of the water molecule which is engaged in just two, albeit strong, hydrogen bonds with the oxygen carbonyl atoms of the adjacent macrocyclic molecules.

### 2.3 Crystallographic data

The structures discussed in this paper have been deposited with the Cambridge Crystallographic Data Centre. Copies of the data can be obtained, free of charge, on application to CCDC, 12 Union Road, Cambridge CB2 1EZ, UK [fax: +44(0)-1223-336033 or e-mail: deposit@ccdc.cam.ac.uk].

**Tab. S2** Crystal data and structure refinement details for solvate (left) and TBACl complex (right) of **Uc1**.

| Compound                                                                      | <b>Uc1</b> ·H <sub>2</sub> O                                                      |                        | <b>Uc1</b> ·TBACl·H <sub>2</sub> O                                                                                  |                        |
|-------------------------------------------------------------------------------|-----------------------------------------------------------------------------------|------------------------|---------------------------------------------------------------------------------------------------------------------|------------------------|
| Structure                                                                     | 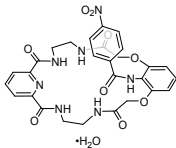 |                        |                                  |                        |
| Empirical formula                                                             | C <sub>30</sub> H <sub>33.25</sub> N <sub>7</sub> O <sub>13.1</sub>               |                        | C <sub>44</sub> H <sub>65</sub> ClN <sub>8</sub> O <sub>10</sub>                                                    |                        |
| Moiety formula                                                                | C <sub>28</sub> H <sub>27</sub> N <sub>7</sub> O <sub>8</sub> ·H <sub>2</sub> O   |                        | C <sub>28</sub> H <sub>27</sub> N <sub>7</sub> O <sub>8</sub> ·C <sub>16</sub> H <sub>36</sub> NCl·H <sub>2</sub> O |                        |
| Formula weight                                                                | 701.49                                                                            |                        | 901.49                                                                                                              |                        |
| CCDC No.                                                                      | 1534255                                                                           |                        | 1534256                                                                                                             |                        |
| Temperature                                                                   | 100 K                                                                             |                        |                                                                                                                     |                        |
| Wavelength                                                                    | 0.71073 Å (MoK <sub>α</sub> )                                                     |                        |                                                                                                                     |                        |
| Crystal system                                                                | Triclinic                                                                         |                        | Monoclinic                                                                                                          |                        |
| Space group                                                                   | P-1                                                                               |                        | P21/c                                                                                                               |                        |
| Unit cell dimensions                                                          | <i>a</i> = 8.2136(7) Å                                                            | <i>α</i> = 85.572(7) ° | <i>a</i> = 9.9445(6) Å                                                                                              | <i>α</i> = 90.00 °     |
|                                                                               | <i>b</i> = 10.2940(9) Å                                                           | <i>β</i> = 88.689(9) ° | <i>b</i> = 15.7022(8) Å                                                                                             | <i>β</i> = 98.244(5) ° |
|                                                                               | <i>c</i> = 22.413(2) Å                                                            | <i>γ</i> = 69.865(5) ° | <i>c</i> = 30.3358(18) Å                                                                                            | <i>γ</i> = 90.00 °     |
| Volume                                                                        | <i>V</i> = 1773.9(3) Å <sup>3</sup>                                               |                        | <i>V</i> = 4688.0(5) Å <sup>3</sup>                                                                                 |                        |
| <i>Z</i>                                                                      | 2                                                                                 |                        | 4                                                                                                                   |                        |
| Density Calc.                                                                 | 1.313 g/cm <sup>3</sup>                                                           |                        | 1.277 g/cm <sup>3</sup>                                                                                             |                        |
| Absorption coefficient                                                        | 0.105 mm <sup>-1</sup>                                                            |                        | 0.146 mm <sup>-1</sup>                                                                                              |                        |
| F(000)                                                                        | 734                                                                               |                        | 1928                                                                                                                |                        |
| Crystal                                                                       | Prismatic, colorless                                                              |                        | Prismatic, colorless                                                                                                |                        |
| Crystal size                                                                  | 0.71 × 0.53 × 0.24 mm                                                             |                        | 0.56 × 0.35 × 0.21 mm                                                                                               |                        |
| θ range for data collection                                                   | 2.76 – 28.62 °                                                                    |                        | 2.68 – 28.66 °                                                                                                      |                        |
| Index ranges                                                                  | -11 ≤ <i>h</i> ≤ 11, -13 ≤ <i>k</i> ≤ 13, -30 ≤ <i>l</i> ≤ 29                     |                        | -12 ≤ <i>h</i> ≤ 13, -21 ≤ <i>k</i> ≤ 21, -40 ≤ <i>l</i> ≤ 39                                                       |                        |
| Reflections collected (all/independent)                                       | 33596 / 7650<br>[ <i>R</i> <sub>int</sub> = 0.05]                                 |                        | 11406 / 7415<br>[ <i>R</i> <sub>int</sub> = 0.033]                                                                  |                        |
| Absorption correction                                                         | Multi-scan                                                                        |                        |                                                                                                                     |                        |
| Refinement method                                                             | Full-matrix least-squares on <i>F</i> <sup>2</sup>                                |                        |                                                                                                                     |                        |
| Data / restraints / parameters                                                | 8543/502/599                                                                      |                        | 11406/0/838                                                                                                         |                        |
| Goodness-of-fit on <i>F</i> <sup>2</sup>                                      | 1.092                                                                             |                        | 0.916                                                                                                               |                        |
| Final <i>R</i> indices [ <i>F</i> <sup>2</sup> > 2σ( <i>F</i> <sup>2</sup> )] | <i>R</i> = 0.050, ω <i>R</i> = 0.163                                              |                        | <i>R</i> = 0.033,<br>ω <i>R</i> = 0.073                                                                             |                        |
| <i>R</i> indices (all data)                                                   | <i>R</i> = 0.068, ω <i>R</i> = 0.174                                              |                        | <i>R</i> = 0.062,<br>ω <i>R</i> = 0.078                                                                             |                        |
| Largest diff. peak and hole                                                   | 0.579 and -0.498 e Å <sup>-3</sup>                                                |                        | 0.287 and -0.304 e Å <sup>-3</sup>                                                                                  |                        |

### 3. Visualization and Cartesian coordinates of calculated structures

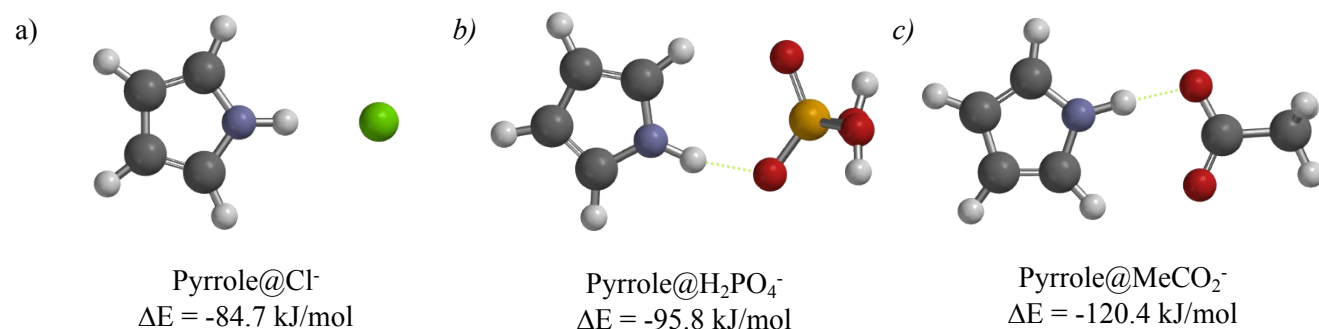

**Fig. S21.** Structures and relative energies of pyrrole with chloride (a), dihydrogenphosphate (b), and acetate (c) anions obtained at DFT/M06-2X/6-311G(d) level of theory; corresponding hydrogen bond interactions are  $d_{N...Cl} = 3.143, 2.756, \text{ and } 2.737$  Å, respectively.

**Table S3.** Cartesian coordinates of the structures of pyrrole, acetate, dihydrogenphosphate, and anion complexes with pyrrole calculated at DFT/M06-2X/6-311G(d) level of theory using program Spartan'16 Parallel Suite<sup>43</sup>

| Pyrrole                  |           |          |           | MeCO <sub>2</sub> <sup>-</sup> |           |           | H <sub>2</sub> PO <sub>4</sub> <sup>-</sup> |   |           |           |           |
|--------------------------|-----------|----------|-----------|--------------------------------|-----------|-----------|---------------------------------------------|---|-----------|-----------|-----------|
| E = -210.122158 au       |           |          |           | E = -228.475980 au             |           |           | E = -643.574252 au                          |   |           |           |           |
| E + ZPE = -670.337099 au |           |          |           | E + ZPE = -228.427217 au       |           |           | E + ZPE = -643.535888 au                    |   |           |           |           |
| N                        | 0.000000  | 0.000000 | 1.117622  | C                              | 0.220244  | 0.001583  | 0.000000                                    | P | 0.000000  | 0.000004  | -0.174661 |
| C                        | 1.120010  | 0.000000 | 0.330394  | O                              | 0.689923  | 1.156582  | 0.000000                                    | O | -0.883022 | -0.990723 | -0.848902 |
| C                        | 0.711051  | 0.000000 | -0.979683 | O                              | 0.802227  | -1.099097 | 0.000000                                    | O | -0.964229 | 0.838773  | 0.883056  |
| C                        | -0.711051 | 0.000000 | -0.979683 | C                              | -1.347137 | -0.055435 | 0.000000                                    | O | 0.883018  | 0.990761  | -0.848863 |
| C                        | -1.120010 | 0.000000 | 0.330394  | H                              | -1.715036 | -1.083850 | 0.000000                                    | O | 0.964233  | -0.838814 | 0.883014  |
| H                        | 2.106872  | 0.000000 | 0.765101  | H                              | -1.730401 | 0.473540  | -0.878782                                   | H | 1.746539  | -0.302581 | 1.036738  |
| H                        | 1.358904  | 0.000000 | -1.842493 | H                              | -1.730401 | 0.473540  | 0.878782                                    | H | -1.746541 | 0.302540  | 1.036747  |
| H                        | -1.358904 | 0.000000 | -1.842493 |                                |           |           |                                             |   |           |           |           |
| H                        | -2.106872 | 0.000000 | 0.765101  |                                |           |           |                                             |   |           |           |           |
| H                        | 0.000000  | 0.000000 | 2.122901  |                                |           |           |                                             |   |           |           |           |

  

| Pyrrole + Cl <sup>-</sup> |           |          |           | Pyrrole + MeCO <sub>2</sub> <sup>-</sup> |           |           | Pyrrole + H <sub>2</sub> PO <sub>4</sub> <sup>-</sup> |   |           |           |           |
|---------------------------|-----------|----------|-----------|------------------------------------------|-----------|-----------|-------------------------------------------------------|---|-----------|-----------|-----------|
| E = -670.420989 au        |           |          |           | E = -438.645889 au                       |           |           | E = -853.734493 au                                    |   |           |           |           |
| E + ZPE = -670.337099 au  |           |          |           | E + ZPE = -438.511941 au                 |           |           | E + ZPE = -853.611268 au                              |   |           |           |           |
| N                         | 0.000000  | 0.000000 | 0.248273  | N                                        | 1.028188  | 0.355076  | 0.000000                                              | N | 1.696177  | -0.493211 | 0.025826  |
| C                         | 1.109423  | 0.000000 | 1.033500  | C                                        | 2.121768  | 1.164623  | 0.000000                                              | C | 1.908739  | 0.845257  | -0.100908 |
| C                         | 0.710715  | 0.000000 | 2.354524  | C                                        | 3.254181  | 0.374394  | 0.000000                                              | C | 3.271124  | 1.064503  | -0.094396 |
| C                         | -0.710715 | 0.000000 | 2.354524  | C                                        | 2.808171  | -0.976209 | 0.000000                                              | C | 3.899187  | -0.205107 | 0.040767  |
| C                         | -1.109423 | 0.000000 | 1.033500  | C                                        | 1.427387  | -0.943293 | 0.000000                                              | C | 2.890297  | -1.142783 | 0.110112  |
| H                         | 2.091853  | 0.000000 | 0.587072  | H                                        | 2.012918  | 2.238884  | -0.000000                                             | H | 1.056172  | 1.505946  | -0.180646 |
| H                         | 1.362581  | 0.000000 | 3.216419  | H                                        | 4.276710  | 0.726344  | 0.000000                                              | H | 3.759136  | 2.025117  | -0.178286 |
| H                         | -1.362581 | 0.000000 | 3.216419  | H                                        | 3.423777  | -1.864843 | 0.000000                                              | H | 4.960127  | -0.408957 | 0.081286  |
| H                         | -2.091853 | 0.000000 | 0.587072  | H                                        | 0.672492  | -1.714654 | 0.000000                                              | H | 2.930838  | -2.216440 | 0.214316  |
| H                         | 0.000000  | 0.000000 | -0.786973 | H                                        | 0.024428  | 0.653610  | 0.000000                                              | H | 0.750371  | -0.904841 | 0.045141  |
| Cl                        | 0.000000  | 0.000000 | -2.894954 | C                                        | -2.228958 | -0.039352 | 0.000000                                              | P | -1.829538 | 0.030854  | -0.009947 |
|                           |           |          |           | O                                        | -1.616009 | 1.062944  | 0.000000                                              | O | -0.968782 | -1.197469 | 0.009420  |
|                           |           |          |           | O                                        | -1.742851 | -1.179803 | 0.000000                                              | O | -2.924511 | -0.201017 | -1.214599 |
|                           |           |          |           | C                                        | -3.769078 | 0.086223  | 0.000000                                              | O | -1.295923 | 1.414300  | -0.118022 |
|                           |           |          |           | H                                        | -4.244680 | -0.895172 | 0.000000                                              | O | -2.777624 | -0.029825 | 1.333821  |
|                           |           |          |           | H                                        | -4.086453 | 0.653426  | -0.878934                                             | H | -3.005976 | 0.870676  | 1.579962  |
|                           |           |          |           | H                                        | -4.086453 | 0.653426  | 0.878934                                              | H | -2.962206 | -1.140963 | -1.411770 |

## 4. References

1. Szumna, A.; Jurczak, J., *European Journal of Organic Chemistry* **2001**, *2001*, 4031-4039.
2. Chmielewski, M. J.; Jurczak, J., *Chemistry – A European Journal* **2005**, *11*, 6080-6094.
3. Chmielewski, M. J.; Jurczak, J., *Chemistry – A European Journal* **2006**, *12*, 7652-7667.
4. Lichosyt, D.; Dydio, P.; Jurczak, J., *Chem. Eur. J.* **2016**, *22*, 17673-17680.
5. Kondo, S.-i.; Nagamine, M.; Karasawa, S.; Ishihara, M.; Unno, M.; Yano, Y., *Tetrahedron* **2011**, *67*, 943-950.
6. Piątek, P., *Tetrahedron Letters* **2007**, *48*, 4427-4430.
7. Juwarker, H.; Lenhardt, J. M.; Castillo, J. C.; Zhao, E.; Krishnamurthy, S.; Jamiolkowski, R. M.; Kim, K.-H.; Craig, S. L., *The Journal of Organic Chemistry* **2009**, *74*, 8924-8934.
8. Hua, Y.; Liu, Y.; Chen, C.-H.; Flood, A. H., *Journal of the American Chemical Society* **2013**, *135*, 14401-14412.
9. Chmielewski, M. Praca doktorska. Instytut Chemii Organicznej PAN, Warszawa, 2003.
10. Jurczak, J.; Dydio, P.; Stepniak, P.; Zielinski, T., *RSC Advances* **2016**, *6*, 41568-41571.
11. Inoue, Y.; Kanbara, T.; Yamamoto, T., *Tetrahedron Letters* **2003**, *44*, 5167-5169.
12. Chmielewski, M.; Jurczak, J., *Tetrahedron Letters* **2004**, *45*, 6007-6010.
13. Chmielewski, M. J.; Szumna, A.; Jurczak, J., *Tetrahedron Letters* **2004**, *45*, 8699-8703.
14. Chmielewski, M. J.; Jurczak, J., *Tetrahedron Letters* **2005**, *46*, 3085-3088.
15. Hossain, M. A.; Kang, S. O.; Powell, D.; Bowman-James, K., *Inorg Chem* **2003**, *42*, 1397-9.
16. Hossain, M. A.; Llinares, J. M.; Powell, D.; Bowman-James, K., *Inorganic Chemistry* **2001**, *40*, 2936-2937.
17. Korendovych, I. V.; Cho, M.; Makhlynets, O. V.; Butler, P. L.; Staples, R. J.; Rybak-Akimova, E. V., *J Org Chem* **2008**, *73*, 4771-82.
18. Kolesnikov, G. V.; German, K. E.; Kirakosyan, G.; Tananaev, I. G.; Ustynyuk, Y. A.; Khrustalev, V. N.; Katayev, E. A., *Organic & Biomolecular Chemistry* **2011**, *9*, 7358-7364.
19. Sessler, J. L.; Katayev, E.; Pantos, G. D.; Ustynyuk, Y. A., *Chemical Communications* **2004**, 1276-1277.
20. Sessler, J. L.; Katayev, E.; Pantos, G. D.; Scherbakov, P.; Reshetova, M. D.; Khrustalev, V. N.; Lynch, V. M.; Ustynyuk, Y. A., *Journal of the American Chemical Society* **2005**, *127*, 11442-11446.
21. Calderon-Kawasaki, K.; Kularatne, S.; Li, Y. H.; Noll, B. C.; Scheidt, W. R.; Burns, D. H., *The Journal of Organic Chemistry* **2007**, *72*, 9081-9087.
22. Satake, A.; Ishizawa, Y.; Katagiri, H.; Kondo, S.-i., *The Journal of Organic Chemistry* **2016**, *81*, 9848-9857.
23. (a) Gale, P. A.; Sessler, J. L.; Král, V.; Lynch, V., *Journal of the American Chemical Society* **1996**, *118*, 5140-5141; (b) Warriner, C. N.; Gale, P. A.; Light, M. E.; Hursthouse, M. B., *Chemical Communications* **2003**, 1810-1811.
24. Sessler, J. L.; An, D.; Cho, W.-S.; Lynch, V., *Journal of the American Chemical Society* **2003**, *125*, 13646-13647.
25. Sessler, J. L.; Cho, W.-S.; Gross, D. E.; Shriver, J. A.; Lynch, V. M.; Marquez, M., *The Journal of Organic Chemistry* **2005**, *70*, 5982-5986.
26. Dąbrowa, K.; Pawlak, M.; Duszewski, P.; Jurczak, J., *Organic letters* **2012**, *14*, 6298-6301.
27. Dąbrowa, K.; Ceborska, M.; Jurczak, J., *Crystal Growth & Design* **2014**, *14*, 4906-4910.
28. Bisson, A. P.; Lynch, V. M.; Monahan, M.-K. C.; Anslyn, E. V., *Angew. Chem., Int. Ed.* **1997**, *36*, 2340-2342.
29. Kang, S. O.; Hossain, M. A.; Bowman-James, K., *Coordination Chemistry Reviews* **2006**, *250*, 3038-3052.
30. Hossain, M. A.; Kang, S. O.; Llinares, J. M.; Powell, D.; Bowman-James, K., *Inorganic Chemistry* **2003**, *42*, 5043-5045.
31. Wang, Q.-Q.; Begum, R. A.; Day, V. W.; Bowman-James, K., *Polyhedron* **2013**, *52*, 515-523.
32. Kang, S. O.; Powell, D.; Day, V. W.; Bowman-James, K., *Angew Chem Int Ed Engl* **2006**, *45*, 1921-5.
33. Wang, Q.-Q.; Day, V. W.; Bowman-James, K., *Angewandte Chemie International Edition* **2012**, *51*, 2119-2123.
34. Yoon, D.-W.; Gross, D. E.; Lynch, V. M.; Lee, C.-H.; Bennett, P. C.; Sessler, J. L., *Chemical Communications* **2009**, 1109-1111.
35. Yano, M.; Tong, C. C.; Light, M. E.; Schmidtchen, F. P.; Gale, P. A., *Org Biomol Chem* **2010**, *8*, 4356-63.
36. RED, C. *Empirical absorption correction using spherical harmonics, implemented in SCALE3 ABSPACK scaling algorithm*, Version 1.171.28; Oxford Diffraction Ltd.
37. *CrysAlisPro (release 16-05-2011 CrysAlis171 .NET)*, Version 1.171.35.11; Agilent Technologies: 2011.
38. Sheldrick, G., *Acta Crystallographica Section A* **1990**, *46*, 467-473.
39. Farrugia, L., *Journal of Applied Crystallography* **1999**, *32*, 837-838.
40. (a) Sheldrick, G., *Acta Crystallogr. Sect. A* **2008**, *64*, 112-122; (b) Sheldrick, G. M., *SHELXL97, Program for Crystal Structure Refinement*. 1997.
41. Wilson, A. J. C.; Geist, V., *Crystal Research and Technology* **1993**, *28*, 110-110.
42. Arunan, E.; Desiraju, G. R.; Klein, R. A.; Sadlej, J.; Scheiner, S.; Alkorta, I.; Clary, D. C.; Crabtree, R. H.; Dannenberg, J. J.; Hobza, P., *Pure and Applied Chemistry* **2011**, *83*, 1637-1641.
43. *Spartan'14 for Windows*, Wavefunction Inc., California, USA: 2014.
